# 1 Risk factors for typhoid fever: A desk review

2 Portia Boakye Okyere<sup>1\*</sup>, Sampson Twumasi-Ankrah<sup>2</sup>, Sam Newton<sup>1</sup>, Samuel Nkansah  
3 Darko<sup>3</sup>, Michael Owusu Ansah<sup>1</sup>, Eric Darko<sup>4</sup>, Francis Opoku Agyapong<sup>4</sup>, Hyon Jin Jeon<sup>5</sup>,  
4 Yaw Adu-Sarkodie<sup>4</sup>, Florian Marks<sup>5,6,7,8</sup>, Ellis Owusu-Dabo<sup>1</sup>.

5 <sup>1</sup>School of Public Health, Kwame Nkrumah University of Science and Technology, Kumasi,  
6 Ghana, <sup>2</sup>Department of Statistics and Actuarial Science, Kwame Nkrumah University of  
7 Science and Technology, Kumasi, Ghana, <sup>3</sup>Department of Molecular Medicine, Kwame  
8 Nkrumah University of Science and Technology, Kumasi, Ghana, <sup>4</sup>Department of Clinical  
9 Microbiology, Kwame Nkrumah University of Science and Technology, Kumasi, Ghana,  
10 <sup>5</sup>International Vaccine Institute, Gwanak-ro, Gwanak-gu, Seoul, South Korea, <sup>6</sup>Department  
11 of Global Public Health, Karolinska Institutet, Stockholm, Sweden, <sup>7</sup>Heidelberg Institute of  
12 Global Health, University of Heidelberg, Heidelberg, Germany, <sup>8</sup>Madagascar Institute for  
13 Vaccine Research (MIVR), University of Antananarivo, Antananarivo, Madagascar

14 Portia Boakye Okyere\* [portiaboky@gmail.com](mailto:portiaboky@gmail.com)

## 15 Abstract

16 **Background and Aim:** Typhoid fever, a significant global health problem, demonstrates a  
17 multifaceted transmission pattern. Knowledge of the factors driving the transmission of  
18 infection is critical for developing effective control strategies and resource allocation. This  
19 comprehensive desk review aimed at synthesizing evidence from 1928 to 2023 on risk factors  
20 associated with typhoid fever transmission.

21 **Method:** We conducted article searches in PubMed, Scopus, Google Scholar, and Semantic  
22 Scholar, using keywords related to risk, contributors, determinants, causes etc. associated  
23 with typhoid fever. We followed a registered protocol to support our search and triangulated  
24 the results.

25 **Results:** In all, we retrieved 1614 articles, of which 216 were reviewed. Of these articles  
26 reviewed, 106 provided data on typhoid fever risk factors. Unsurprisingly, of the total articles  
27 reviewed on risk factors, about 72% (76/106) originated from the Asian (48.1%, 51/106) and  
28 African (23.6%, 25/106) continents. A higher proportion, 47.2% (50/106) of the articles  
29 indicated risk factors related to socio-economic and housing transmission. Additional risk  
30 factors included foodborne transmissions (45.3%, 48/106), WASH: **W**aterborne  
31 transmissions (42.5%, 45/106), **S**anitation and **H**ygienic practices (32.1%, 34/106), travel-  
32 related risk (16.0%, 17/106), antimicrobial agents (13.2%, 14/106), climate (13.2%, 14/106),  
33 environmental (8.5%, 9/106), typhoid carriers (10.4%, 11/106), and host risk (5.7%, 6/106)  
34 factors to disease transmission.

35 **Conclusion:** These findings highlight the necessity for targeted and combined interventions  
36 including improved sanitation infrastructure, enhanced WASH practices and the use of  
37 vaccines in endemic areas. Implementing effective strategies informed by this review can aid  
38 clinicians, public health experts, and policymakers in efficiently mitigating the burden of  
39 typhoid fever.

40 **Keywords:** typhoid fever, risk factors, foodborne, waterborne, desk review.

## 41 Introduction

42 Typhoid fever (TF) is a potentially fatal febrile systemic disease caused by *Salmonella*  
43 *enterica* serotype Typhi (*S. Typhi*), a rod-shaped Gram-negative bacterium belonging to the  
44 *Enterobacteriaceae* family. *S. Typhi* exists exclusively in humans and causes illnesses that  
45 resemble many other febrile diseases<sup>1</sup>. A description of the infection was reviewed by  
46 Cunha<sup>2</sup>, clearly separating it from other febrile illnesses and associating its clinical  
47 manifestation with significant pathologic abnormalities in the spleen, mesenteric lymph  
48 nodes, and intestines. Nonetheless, the mainstay of diagnosis is a microbial culture, usually  
49 with blood or bone marrow samples. Although bone marrow culture is highly sensitive, it is  
50 both invasive and technically unfeasible in most settings. As a result, the disease is usually  
51 diagnosed with blood culture despite its limited sensitivity of about 40–80%, partly due to  
52 antibiotic exposures before the patient visits the health facility<sup>3</sup>.

53 The disease transmission is by the faecal-oral route and can take two main forms: direct  
54 transmission, where food and water in the immediate environment get contaminated through  
55 poor hygiene and sanitation practices, either by transient or chronic carriers; and indirect  
56 transmission, where the broader environment becomes contaminated when sewage pollutes  
57 water supplies, raw human faeces or untreated sewage are used as a crop fertilizer or piped  
58 water inadequately treated<sup>4</sup>.

59 Before 2000, the global burden of typhoid fever was estimated at 16 million illnesses and 600  
60 thousand deaths annually<sup>5</sup>. In 2000, about 21.7 million illnesses and 216,000 deaths  
61 occurred<sup>6</sup>. By 2010, annual estimates indicated around 26.9 million cases and 200,000  
62 fatalities<sup>7</sup>. A current estimate in 2017 suggests that the number of typhoid cases per year has  
63 decreased to 14.3 million, representing a 44.6% decrease in the global burden of typhoid  
64 fever<sup>8</sup>. Typhoid fever affects people of all ages, although children are more susceptible than  
65 other age groups<sup>9</sup>.

66 Typhoid fever can be prevented and controlled concurrently with vaccinations and  
67 advancements in food safety, water quality, hygiene and sanitation<sup>10</sup>. Three main generations  
68 of typhoid vaccines are presently approved for use by the World Health Organization  
69 (WHO): typhoid conjugate vaccine (TCV), live attenuated Ty21a, and the unconjugated Vi  
70 polysaccharide (ViPS) vaccines<sup>4</sup>. The WHO strongly recommends the use of TCV, for all  
71 ages due to its superior immunological properties, suitability for use in younger children, and  
72 predicted longer period of protection above 2 years, which was a major limitation for the use  
73 of the ViPS. However, to inform the choice of vaccination in a country, evidence on the  
74 scope of the problem as well as risk factors for the disease transmission in the area is  
75 required<sup>10</sup>. Despite notable progress in typhoid control, the disease remains a significant  
76 cause of morbidity and mortality to which billions of people worldwide are continuously  
77 exposed, particularly in Asia and sub-Saharan Africa.

78 The susceptibility of typhoid fever disease depends on a myriad of factors with distinct  
79 modes of transmission. In endemic countries, knowledge of typhoid fever risk factors is  
80 critical for developing effective control strategies and allocating resources. Several  
81 epidemiologic and modelled studies<sup>11-13</sup> have explored location- and time-specific risk factors  
82 for typhoid fever. In addition, various review studies have been undertaken to  
83 comprehensively understand and address the risk of typhoid across different transmission  
84 routes. For instance, Lee et al.<sup>14</sup> employed geospatial modelling to develop a typhoid risk  
85 index based on factors like water sources, toilet facilities, and population density, aiming to  
86 explain the geographical distribution of typhoid risk in impoverished countries. Likewise,  
87 Kim et al.<sup>15</sup> modelled the incidence of typhoid by investigating the relationship between  
88 observed incidence rates and various geospatial covariates, such as access to improved water  
89 and sanitation, the health and environmental conditions of the population, which may  
90 influence the transmission of *S. Typhi*. Brockett and colleagues<sup>16</sup> also systematically  
91 reviewed case-control studies to uncover associations between Water, Sanitation, and

92 Hygiene (WASH) practices, food exposures, and typhoid fever. Similarly, Mogasale et al.<sup>17</sup>  
93 performed a meta-analysis spanning 1990 to 2013 to estimate the risk of typhoid associated  
94 with inadequate access to safe water. Meanwhile, Ma et al.<sup>18</sup> reviewed human genetic  
95 variants affecting susceptibility to enteric fever infection, and Levantesi et al.<sup>19</sup> assessed the  
96 contribution of natural freshwater and drinking water as routes of *Salmonella* contamination  
97 from 2000 to 2010. While these studies collectively provide valuable insights into various  
98 aspects of typhoid risk, there remains a lack of a comprehensive review that synthesizes the  
99 existing knowledge on typhoid risk factors. This gap led us to ask: what do we know about  
100 the risk factors for typhoid fever? To address this, we aimed to conduct a desk review on risk  
101 factors for typhoid fever integrating the various transmission dynamics to inform targeted  
102 interventions for reducing typhoid incidence worldwide.

## 103 **Methods**

### 104 **Search strategy**

105 We searched PubMed, Scopus, Google Scholar, and Semantic Scholar for published articles  
106 on risk factors for typhoid fever. The search took place in June 2023 with titles and abstracts  
107 from databases downloaded and saved. Each database was searched using the following  
108 terms and keywords: Risk factors, factors, contributors, determinants, causes, predictors,  
109 susceptibility factors, factors of exposures, predisposing factor, typhoid fever, typhoid,  
110 *Salmonella* typhoid, *Salmonella* Typhi, *S. Typhi*, typhoid disease, typhoidal *Salmonellosis*,  
111 and typhoidal *Salmonella* and without perforation, complication, virulence, severe, and non-  
112 typhoid. We placed no restrictions on the publication year but language was restricted to  
113 English. We followed a protocol adapted from the PRISMA guidelines, which was registered  
114 with the Open Science Framework (OSF) on January 2024 (DOI:  
115 <https://doi.org/10.17605/OSF.IO/87JV9>), to structure our search. This study used published  
116 articles and as such, permission from the institutional review board was not required.

### 117 **Study screening and selection criteria**

118 We screened and selected typhoid fever studies reporting on risk factors. In such studies,  
119 typhoid fever infections or outbreaks were required to be caused by *S. Typhi* either by  
120 culturing bodily fluids or stool, Polymerase Chain Reaction (PCR), Widal or any other  
121 serological test. Furthermore, we selected epidemiological or modelled studies of any design.  
122 Additionally, we excluded studies on severe infections (complication and mortality), studies  
123 that classified typhoid fever based on clinical indicators (i.e., signs and symptoms) or with  
124 unclear diagnostic methods and studies with non-human participants including animals, water  
125 samples, and farm-produce. Finally, articles with full text not written in English or cannot be  
126 located were excluded. The details of our inclusion and exclusion criteria can be located in  
127 the screener instruction section in the [review protocol](#).

128 The titles and abstracts downloaded from each database were imported into EndNote X8.2  
129 (Bld 13302), merged into a single reference list and duplicates eliminated. The de-duplicated  
130 list was then uploaded to an online systematic review tool Rayyan (Qatar Computing  
131 Research Institute, Doha, Qatar) for titles and abstracts screening<sup>20</sup>. Thereafter, all included  
132 citations were exported into Microsoft Excel, Version 16.16.27 (201012) for full-text  
133 retrieval and screening. Each subsequent process, including title and abstract review, full-text  
134 review, and data extraction, was performed by one author (Portia Boakye Okyere: PBO) with  
135 supervision from co-authors (Ellis Owusu-Dabo: EOD, Sam Newton: SN and Sampson  
136 Twumasi-Ankrah: STA). PBO resolved discrepancies collectively with the co-authors. Data  
137 were then extracted into Microsoft Excel and uploaded to a shared Google Sheets spreadsheet

138 (Google LLC, Mountain View, CA, USA) (S2) and reported using Microsoft Word, Version  
139 16.16.27 (201012). Co-authors reviewed the final dataset for completeness and accuracy.

#### 140 **Data extraction**

141 Electronic searches were performed using the internet to locate all eligible articles, and all  
142 relevant data relating to the research question were manually extracted into Microsoft Excel  
143 after reading the full text. The extracted data included specific risk factors for typhoid fever  
144 in all eligible articles. In addition, data on the route of transmission, sources of infection, year  
145 of publication, data collection period, town/district, country and continent of the study, study  
146 setting (outbreak or endemic), diagnostics method, study type, number of *S. Typhi* cases,  
147 total participants enrolled, ages of participants, study design, and citations were extracted  
148 (S2). We grouped the ages of participants into three based on inclusion age and age  
149 ranges/groups: “children” were  $\leq 15$  years, “adults” as  $>15$  years, and “mixed ages” were both  
150 adults and children participants. Information on typhoid fever susceptibility was grouped  
151 according to their transmission routes; water- and food-borne transmissions, host risk factors,  
152 vaccination, travel-related risk, health education, occupational risk, population growth and  
153 overcrowding, sanitation and sewage systems, climate and meteorological factors,  
154 antimicrobial resistance, socio-economic and housing factors were extracted.

#### 155 **Results**

156 Our search strategy initially identified 1614 articles. After removing 217 duplicates (Figure  
157 1), 1397 titles and abstracts remained for screening. Of these, 1181 were excluded, with  
158 majority (687 articles) not reporting typhoid fever risk factors as shown in Fig1. After a full-  
159 text review of 216 articles, 110 were further excluded, primarily due to the absence of clear  
160 risk factors in 34 articles. Other reasons for exclusion include 25 duplicates of the same study  
161 published by different authors in different journals, 10 studies involving non-human subjects  
162 such as farm-produced and water samples, 17 articles for non-English full-text and full-text  
163 not found, 6 articles not specifically related to *S. Typhi*, and 9 articles with missing or  
164 inappropriate diagnosis based on recall TF episodes, unclear diagnosis and clinical indicators  
165 (signs and symptoms). Furthermore, to avoid content duplication, 9 review articles were  
166 excluded. Finally, a total of 106 published articles were included in this review, ranging  
167 from<sup>11-13,21-123</sup> (S2).

#### 168 **Study characteristics**

169 Among the 106 eligible articles (S2), data were collected from 1966 through 2020, spanning  
170 6 continents: 23.6% (25/106) from Africa, 48.1% (51/106) from Asia, 0.9% (1/106) from  
171 South America, 8.4% (10/106) from North America, 9.4% (10/106) from Europe, and 6.6%  
172 (7/106) from Australia. Two articles (1.9%, 2/106) collected data from mixed continents,  
173 while one article (0.9%, 1/106) relied on the GeoSentinel Surveillance Network database,  
174 lacking specific location details (S1 Table 1). Regarding transmission routes, over 42.0%  
175 (45/106) of the articles examined typhoid fever risk factors suggesting waterborne  
176 transmission, while 45.3% (48/106) focused on foodborne transmission. Socio-economic and  
177 housing factors were covered in most (47.2%, 50/106) of the publications, hygiene and  
178 sanitation in 32.1% (34/106) articles, and all other TF risk factors in 74.6% (79/106) articles,  
179 (S1 Table 2). Across 101 papers, a total of 246,888 typhoid fever cases were reported, with a  
180 median (IQR) of 109 (50, 260). The diagnosis was confirmed predominantly through culture  
181 in 86.8% (92/106) of the articles, with 19.8% (21/106) articles using Widal and other  
182 serological tests and 5.7% (6/106) using PCR and other sequencing techniques. Age  
183 distribution data were available in 100 articles, with the majority 82% (82/100) including



184 participants of mixed ages, while over 14% (14/100) focused on those  $\leq 15$  years and 4%  
185 (4/100) on those  $>15$  years, (S1 Table 1).

## 186 **Discussion**

187 Our desk review has allowed us to synthesize the evidence on typhoid fever risk factors from  
188 1928 to 2023. We have identified specific risk factors suggesting waterborne and foodborne  
189 transmissions, socio-demographic, economic and housing factors, hygiene and sanitation,  
190 host risk factors, antimicrobial agents and typhoid carriers that could influence typhoid fever  
191 transmission. This is potentially important information for clinicians, public health experts  
192 and policymakers because effective control strategies can be developed as well as allocating  
193 limited resources mostly in endemic countries.

194 Approximately 72% of the reviewed articles collected data from Asia and Africa continents,  
195 where most of the developing countries are located. This is in accordance with the global  
196 burden of typhoid fever estimation, which shows that Asian and African countries bear the  
197 greatest burden<sup>124</sup>. The low number of articles in Europe, Northern America and Australia  
198 can be attributed to the introduction of control programs such as the treatment of municipal  
199 water, pasteurization of dairy products, and exclusion of human faeces from food  
200 production<sup>1,125</sup>. Likewise, the lack of studies from Southern America can be attributed to the  
201 decline in typhoid burden given the economic transition with improved water and sanitation  
202 in the area<sup>1</sup>.

### 203 **Waterborne transmission**

204 Water sources greatly impact the spread of typhoid fever, with protected wells and piped  
205 water classified as safe, while rivers, streams and other unprotected sources are deemed  
206 unsafe<sup>126</sup>. Our review identified specific risk factors (Table 1) associated with typhoid fever  
207 and water sources, including having multiple drinking water sources<sup>66</sup>, use of non-municipal  
208 water sources for various purposes<sup>27,66,105</sup>, and main water sources with foul smell<sup>35</sup>.  
209 Regarding multiple water sources, households face potable water access challenges like  
210 limited hours, high tariffs, low pressure, and long distances from water sources. These  
211 challenges impede their ability to meet daily needs. Consequently, some households close to  
212 open-dug wells, rivers or streams may use these sources for bathing, cooking, or drinking<sup>113</sup>.  
213 Although convenient, these water sources often lack chlorination and may be contaminated  
214 with faecal matter, posing a risk for typhoid fever transmission. This risk is increased by foul-  
215 smelling water points that could contain pathogens such as *S. Typhi*<sup>35</sup>.

216 Defects in water supply systems can also facilitate the transmission of typhoid fever. Our  
217 study further discovered a typhoid fever outbreak associated with a gravity-fed network<sup>51</sup>,  
218 indicating a probable spread through an outdated mains system. Due to low water pressure,  
219 insufficient chlorination and faecal infiltration were implicated<sup>11</sup>.

220 Intermittent piped water supply, common in developing countries, poses health risks by  
221 causing contamination in non-pressurized pipes and creating negative pressure situations that  
222 enable pathogens like *S. Typhi* to enter the system, thereby increasing the risk of typhoid  
223 transmission<sup>11,127</sup>. Frequent interruptions in water supply also raise awareness of water  
224 storage practices, potentially increasing recontamination risks during storage and prompting  
225 households to turn to unsafe alternative water sources<sup>11,27</sup>. Households relying on water  
226 supplied from government overhead tanks<sup>41</sup> and community or public taps<sup>32,113</sup> may not  
227 always be microbiologically safe due to environmental conditions supporting contamination.  
228 Water contamination from various sources, including industrial activities, sewage discharges,  
229 agricultural practices, and urban runoff, poses other risks for typhoid transmission, as  
230 demonstrated by studies attributed to drinking contaminated water from unprotected

231 groundwater sources and communal water sources exposed to human and animal waste<sup>24,78</sup>.  
232 The presences of *Escherichia coli* (*E. coli*) in drinking water is commonly regarded as an  
233 indicator of fecal contamination and a potential risk factor for typhoid fever due to the  
234 possible presence of enteric pathogens<sup>77</sup>. However, the relationship between *E. coli* and  
235 typhoid fever risk remains inconclusive. For instance, Karkey et al.<sup>128</sup> observed a link  
236 between concentrations of *E. coli* in drinking water and the presence of *S. Typhi* nucleic  
237 acids. In contrast, Luby and colleagues<sup>32</sup> found no significant difference in the levels of *E.*  
238 *coli* in household water samples between individuals with typhoid and control groups,  
239 challenging the consistency of this connection. Furthermore, water storage practices  
240 significantly impact typhoid transmission, with studies indicating a decline in microbiological  
241 water quality post-collection<sup>96</sup>. Increased contamination risk is associated with the type of  
242 vessel used to store or draw drinking water, with wide-mouthed containers posing higher  
243 infection risks compared to tipped containers due to their large open surface area and  
244 increased faecal contamination opportunities<sup>36,96</sup>. Untreated water, both inside and outside  
245 homes, poses significant risks for typhoid fever transmission<sup>25,30,46,87</sup>. Despite improvements  
246 in municipal water system filtration and chlorination, contamination with *S. Typhi* from  
247 wastewater cross-contamination remains possible<sup>44</sup>. Household water disinfection may be  
248 necessary to enhance water quality<sup>35</sup>. However, some households opt out of water treatment  
249 due to perceived safety<sup>96</sup>. Consuming water directly from pipes or other protected sources,  
250 even if contaminated, may contain insufficient bacteria to cause typhoid fever. Conversely,  
251 untreated water from unprotected sources may carry high *S. Typhi* levels, enough to cause  
252 clinical disease<sup>24,32,45</sup>. All risk factors discussed above are listed in Table 1.

### 253 **Foodborne transmission**

254 Food serves as a highly efficient medium for the growth of *S. Typhi* compared to water<sup>32</sup>.  
255 This study revealed specific risk factors indicating potential foodborne transmission of  
256 typhoid fever (Table 2) with street stalls (restaurants) emerged as a major factor. Street food  
257 stalls are typically small, outdoor seating without refrigerators, easy access to potable water  
258 or adequate facilities for washing food and utensils<sup>27,32,43</sup>. Therefore, persons who frequently  
259 consume food from such establishments are at increased risk of developing typhoid fever<sup>27</sup>,  
260 possibly due to the use of untreated or tap water stored or served in contaminated containers  
261 for food preparation and drinking purposes<sup>43</sup>. Additionally, poor hygiene practices among  
262 street food vendors, including irregular handwashing<sup>120</sup>, and the potential exposure to carriers  
263 of *S. Typhi* contribute to the risk of infection<sup>129</sup>. Food preparers and handlers in the street or  
264 market eateries may lack knowledge of safe food production precautions to avert *S. Typhi*  
265 infections. They have no idea that they could be *S. Typhi* carriers because they did not apply  
266 for a license or registration from the food authorities, as a result, they are neither educated  
267 nor regularly inspected<sup>43,106</sup>. Consequently, they may share food and alcoholic beverages  
268 using poorly cleaned cups and other utensils between multiple clients<sup>95,118</sup>. Furthermore,  
269 Consumption of frozen foods such as ice cream<sup>12,28,47</sup>, shakes made from tropical fruits<sup>82</sup> and  
270 iced drinks<sup>27</sup> have also been linked to typhoid fever. Street vendors may purchase ice in large  
271 blocks made of unclean water from ice factories that produce ice for fisheries, not for human  
272 consumption, however, this ice is served in drinks for clients. Research has shown that *S.*  
273 *Typhi* can survive in ice for extended periods, thus the ice may potentially harbour the  
274 bacteria<sup>27,43,120</sup>. Likewise, the iced drink might be contaminated by street vendors who may  
275 be *S. Typhi* carriers in the distribution chain<sup>27</sup>. In contrast, dining at tea houses appears to  
276 decrease the risk of typhoid fever, as customers are primarily served boiled water and tea,  
277 limiting exposure to *S. Typhi*<sup>45</sup>. Consumption of uncooked or raw foods like onions, milk,  
278 meat, shellfish, papaya, cabbage and other traditional raw foods, poses a significant risk for  
279 typhoid fever<sup>29,35,36,56,116</sup>. Failure to wash fruits and vegetables before consumption also

280 increases the risk of infection due to surface contamination<sup>11,36,45</sup>. Cross-contamination  
281 during meat handling may occur when the same knives and cutting boards for infected and  
282 uninfected meat are used in butcheries and restaurants. Furthermore, using contaminated  
283 water to wash carcasses and food contact surfaces might expose meat surfaces to *S. Typhi*<sup>56</sup>.  
284 Moreover, inadequate hygiene practices during milk processing may contribute to the  
285 contamination of dairy products, including butter, yoghurt, and homemade cheese<sup>12,36,56</sup>.  
286 While dairy animals do not harbour *S. Typhi*<sup>130</sup>, contaminated dairy products can serve as  
287 effective growth media for the pathogen<sup>56</sup>.

## 288 **Socio-economic and housing factors**

289 Our study findings presented in Table 3 showed socio-economic and housing factors as risks  
290 for typhoid fever transmission. Firstly, demographic characteristics including age and sex  
291 emerged as a major determinant of susceptibility to typhoid fever in this category. Gender  
292 dynamics introduce complexities, with conflicting findings regarding its association with  
293 typhoid fever risk. While a study suggests that males face greater exposure due to  
294 occupational, dietary factors or a lack of immunity<sup>80</sup>, others propose that females, influenced  
295 by their physiological status, hormonal imbalance and gender-specific activities, are more  
296 susceptible<sup>118,119</sup>. Nonetheless, a study by Rasul et al.<sup>131</sup> maintains that typhoid fever  
297 incidence is independent of gender, affecting both males and females across all age groups  
298 equally. Age serves as a significant factor in typhoid transmission, with both young children  
299 and older adults identified as vulnerable groups<sup>119,132</sup>. Young children, characterized by their  
300 underdeveloped immune systems<sup>31,40,85</sup> and limited understanding of disease  
301 transmission<sup>56,85</sup>, face heightened risks of infection. Whereas younger adults are predisposed  
302 to infections due to their adventurous lifestyle or unsanitary activities, such as eating junk  
303 food, and an increased number of social gatherings<sup>22,40,56</sup>, older adults are more likely to be  
304 *S. Typhi* resistant due to continual immune-boosting<sup>132</sup>. Conversely, older adults may  
305 experience susceptibility as they are more exposed to occupational hazards of farming-related  
306 water contact activities<sup>56,66</sup>, rearing chicken or goats<sup>66</sup>, mishandling of *S. Typhi* samples by  
307 clinical staff<sup>70,89</sup>, and being a sewage worker<sup>89</sup>. With regards to rearing chicken, as *S. Typhi* is  
308 a human-adapted pathogen, it is likely that animal keeping is a confounder and may be  
309 associated with poor unhygienic conditions in the home<sup>90</sup>.

310 Our investigation further revealed that socio-economic status correlates with an increased  
311 likelihood of *S. Typhi* infection<sup>94</sup>. Studies suggest that typhoid fever is more common in low-  
312 income countries and is connected to poor public health and low socio-economic  
313 indicators<sup>22,81</sup>. However, a contrasting study<sup>88</sup> identified a protective effect of the wealth  
314 index on typhoid fever, suggesting that residing in affluent districts within low- or middle-  
315 income countries could significantly mitigate the risk. Moreover, the impact of per capita  
316 GDP and disposable income on typhoid fever transmission was identified<sup>100</sup>, highlighting the  
317 association between economic status and disease susceptibility. Hence, the likelihood of  
318 contracting typhoid fever may hinge upon various economic factors such as the economic  
319 foundation of the residency area, individual economic status, access to healthcare, and  
320 advancements in disease diagnosis, ultimately contributing to an increase in the detection rate  
321 of typhoid fever. Notably, insufficient case detection is observed when febrile patients fail to  
322 seek medical attention or undergo blood testing, emphasizing the critical role of consultation  
323 rates and diagnostic measures in controlling the spread of typhoid fever<sup>100</sup>.

324 In the context of education, our research highlights the lack of certificate education,  
325 indicating individuals who have never attended school, as a significant risk factor associated  
326 with the perception of typhoid fever. This suggests that a low level of education correlates  
327 with limited awareness of how the disease spreads<sup>100,118</sup>. Studies<sup>88,103</sup> emphasize that the  
328 number of years spent in formal education directly influences one's understanding of typhoid

329 fever transmission. Specifically, uneducated people, exhibit a higher likelihood of contracting  
330 typhoid fever compared to those with formal education<sup>102</sup>. However, it is noteworthy that  
331 being a student<sup>45</sup> and attending school (daycare)<sup>66</sup> are independent risk factors for typhoid  
332 fever. Certain exposures within educational environments may increase the risk of infection  
333 among students. More importantly, health education, which encompasses awareness of  
334 practices such as handwashing with soap as recommended by WHO, is deemed essential.  
335 This form of education is considered a state of mind and may not necessarily be acquired  
336 solely through formal education systems. Table 5 illustrates specific risks associated with  
337 health education, such as a lack of knowledge regarding contact with typhoid fever<sup>26,95</sup>.  
338 Individuals lacking this knowledge are less likely to take preventive measures, increasing  
339 their susceptibility to infection.  
340 Another significant factor for typhoid transmission (Table 5) aside from knowledge is the  
341 awareness of the presence of a typhoid patient at home<sup>118</sup>. Individuals who are unsure of the  
342 presence of another/previous typhoid patient at home are more likely to have typhoid or a  
343 recurrence than those with full awareness. Typhoid patients may continue to shed *S. Typhi* in  
344 their stool and urine after initial antimicrobial treatment and up to 10% may do so for up to 3  
345 months while others proceed to become asymptomatic carriers<sup>1</sup>. These transient or chronic  
346 carriers can be a source of reinfection<sup>133,134</sup> or reactivation of previous infections<sup>135</sup> at home  
347 and household members well informed of their presence may gain more knowledge about the  
348 disease, how it is transmitted, and how to avoid infection by the pathogen.  
349 Recent contact with typhoid patients has also been observed as a risk factor in the Mekong  
350 Delta, southern Vietnam<sup>46,86</sup>. Traditional visits to sick persons might increase contact  
351 between individuals in the community. Close contacts who have visited a typhoid case are  
352 likely to live in the same area. Therefore, they might use the same water supply, i.e.  
353 transmission may still have occurred via water and not by person-to-person spread. Health  
354 education could assess and address the issue of contact with a sick person.  
355 Lastly, overcrowding and housing conditions identified in Table 3 represent another critical  
356 dimension influencing typhoid fever transmission dynamics<sup>29,31,102</sup>. Overcrowding and poor  
357 housing infrastructure, particularly prevalent in squatter settlements, create environments  
358 conducive to person-to-person spread<sup>26</sup>. Inadequate access to sanitation facilities<sup>13,111</sup> further  
359 exacerbates transmission risks, perpetuating cycles of infection within vulnerable  
360 populations.

### 361 **Hygiene and Sanitation risk factors**

362 The risk factors outlined in Table 4 underscore the significant impact of hygiene and  
363 sanitation on the spread of typhoid fever. Poor handwashing practices emerge as a notable  
364 risk factor, given the crucial role hands play in transmitting *S. Typhi* through the oral-fecal  
365 cycle<sup>23,28,118,121</sup>. While handwashing with soap and clean water effectively removes  
366 pathogens<sup>27</sup>, inadequacies in technique, such as rinsing without soap<sup>51,120</sup> or neglecting  
367 handwashing after defecation<sup>11,95</sup>, can increase the risk of bacterial spread<sup>104</sup>. Furthermore,  
368 using medicated soaps is an added advantage since it is more effective in eliminating bacteria  
369 from hands compared to regular soaps<sup>26</sup>.  
370 As mentioned earlier, typhoid fever is an oral route disease, and poor sanitation can trigger  
371 the disease<sup>94</sup>. The condition of the sewerage system has an important impact on typhoid fever  
372 incidence. Unimproved or damaged sanitation facilities and improper solid waste disposal are  
373 major sources of *S. Typhi*. According to Prasad et al.<sup>11</sup>, people lacking access to improved  
374 sanitation facilities or with damaged improved sewerage systems are particularly vulnerable.  
375 Moreover, household toilets built by persons without expertise are poorly constructed,  
376 situated in permeable soil, and prone to flooding and leaks, potentially leading to pollution of  
377 surface water and crops by human faeces<sup>77</sup>. Strengthening the installation of sanitary excreta



378 facilities, along with proper waste disposal measures, is essential for more efficiently  
379 preventing typhoid fever. There is a direct correlation between improper solid waste disposal  
380 and the prevalence of typhoid fever<sup>25</sup>. Where sanitation and garbage disposal are lacking,  
381 typhoid fever continues to threaten life. Improper disposal of excreta within residential areas  
382 is associated with the risk of typhoid fever<sup>77</sup>. Preventing excreta from entering the domestic  
383 arena has a greater impact on typhoid transmission than behaviours preventing pathogens in  
384 the environment from being ingested (e.g. hand washing).  
385 Furthermore, pit latrines, open defecation or sewer, burst sewer pipes at home and visible  
386 urine or faeces, have all been identified as risk factors for typhoid fever in several  
387 studies<sup>27,51,90,94</sup>.  
388 Finally, the discharge of unsterilized water from hospital and residential sewage into  
389 rainwater canal systems used to irrigate farmlands where vegetables are cultivated leads to  
390 contamination of the produce<sup>108</sup>. These contaminated vegetables are often consumed without  
391 thorough washing, contributing to an increased incidence of typhoid fever. Particularly  
392 during the rainy season, when irrigation with more polluted water is common, the spread of  
393 pollution from farmlands, mixed with garbage, poses a heightened risk to human-inhabited  
394 areas.

### 395 **Other risk factors for typhoid fever**

396 Table 5 presents other typhoid risk factors of antimicrobial agents, host factors, vaccination,  
397 travel-related risk, and environmental and climate conditions. Antimicrobial exposure has the  
398 greatest impact on *S. Typhi* infection. Prior use of antimicrobials at disease onset connects  
399 with an increased risk of typhoid infection, particularly concerning both multiple (MDR) and  
400 extensively (XDR) drug-resistant strains<sup>61,79</sup>. Likewise, studies indicate a relationship  
401 between frequent or recent antimicrobial use within four weeks preceding illness onset and  
402 the occurrence of typhoid fever<sup>32,42,45,99</sup>. Antimicrobial exposure can induce prolonged  
403 alterations in gut flora and compromise the barrier against bacterial colonization, thereby  
404 reducing the threshold of *S. Typhi* required for infection<sup>45</sup>. Furthermore, we discovered in  
405 studies such as Yousafzai et al.<sup>117</sup>, Srinivasan et al.<sup>101</sup>, and Kamal et al.<sup>79</sup> emphasizing  
406 antimicrobial resistance as a risk factor for typhoid fever with certain resistant strains capable  
407 of causing epidemics. Antimicrobial resistance is caused by the routine presence of *S. Typhi*  
408 in the human intestine, and indiscriminate antibiotic usage<sup>42,61</sup>. Consequently, drug-resistant  
409 *S. Typhi* strains, facilitated by the presence of multiple virulence factors, are becoming more  
410 frequent worldwide. Notably, we identified specific risk factors associated with *S. Typhi*-  
411 resistant strains encoding a range of virulence genes, including those within the H58 lineage,  
412 capable of infecting and interacting with host cells<sup>58,60,101,119</sup>.

### 413 **Host risk factors**

414 Host genetic factors influence susceptibility to infectious diseases in humans. Our review  
415 turned up a study by Mustafa et al.<sup>33</sup> that explored the relationship between genetic  
416 polymorphisms and the risk of typhoid fever. The findings suggested that individuals with the  
417 2R3R heterozygote for the intronic VNTR of IL4 may be genetically predisposed to typhoid  
418 fever. However, a study by Dunstan et al.<sup>122</sup> suggested that a haplotype in the TNF locus  
419 offers protection from typhoid. Another study<sup>47</sup>, found a link between serum anti-*H. pylori*  
420 immunoglobulin G (IgG) antibodies and an increased risk of typhoid fever. The presence of  
421 serum IgG antibodies indicates either prior or active infection with *H. pylori*, as antibodies  
422 can persist even after infection clearance, potentially increasing the risk of infections<sup>47,136,137</sup>.  
423 A possible explanation is that the gastric-acid barrier serves as a crucial defense mechanism  
424 against *S. Typhi* infection. *H. pylori* infection has been associated with hypochlorhydria, a

425 condition that impairs the gastric-acid barrier in the stomach<sup>47,107</sup>. This impairment may be  
426 the mechanism through which *H. pylori* infection increases the risk of typhoid fever.  
427 A substantial relationship between typhoid fever and having a chronic underlying condition  
428 disease was also identified in our review<sup>67</sup>. This could be explained by the fact that *S. Typhi*  
429 was not cleared from the body due to the weakening immune system caused by the  
430 underlying chronic diseases. For instance, while *S. Typhi* is not widely associated with AIDS  
431 in developed countries, this relationship is observed in endemic areas. We uncovered a study  
432 by Gotuzzo et al.<sup>69</sup> that found an increased risk of typhoid in HIV-infected patients from  
433 typhoid-endemic areas. It is worth mentioning that the majority of the HIV-positive patients  
434 enrolled in the study were homosexuals, suggesting a potential increase in typhoid incidence  
435 due to direct faecal-oral transmission among the homosexual population.

### 436 **Travel-related risk**

437 Typhoid fever, once prevalent in industrialized countries, is now effectively controlled<sup>89,91</sup>,  
438 yet imported infections remain a significant public health concern<sup>37,50,83</sup>. In our study, we  
439 identified the risk of typhoid fever associated with travel, as detailed in Table 5. The risk of  
440 infection among travellers varies depending on factors such as age, destination, duration, and  
441 purpose of travel<sup>97</sup>. Travellers visiting friends or relatives (VFRs) are in a high-risk category  
442 for typhoid fever<sup>37,59,71</sup>. Because they are much less likely than other travellers to seek pre-  
443 travel counselling, they may visit more rural, remote areas and engage closely with local  
444 people as well as eat high-risk foods and beverages<sup>49</sup>. Children and young adolescents who  
445 are VFRs are also at high risk of contracting typhoid fever due to a lack of immunity or the  
446 possibility of travelling under unhygienic conditions<sup>59,80,97</sup>. We also discovered that travelling  
447 to endemic locations increases the risk of contracting typhoid<sup>50,57,84,91</sup>. According to Lin et  
448 al.<sup>84</sup>, over half of all travellers with typhoid returning to developed countries come from Asia  
449 or Africa, where the disease is widespread. This may also reflect increased exposure to these  
450 environments. Moreover, the risk of infection is highest during extended journeys to endemic  
451 areas. Short-term visitors to such areas face lower risk<sup>37</sup>. Economic globalization facilitates  
452 the movement of travellers for business or tourism, contributing to disease spread.  
453 Consequently, the influx of workers and foreign tourists, often without proper disease-  
454 preventive education or vaccines, increases the risk of typhoid infection<sup>80,100</sup>.

### 455 **Vaccination**

456 Vaccination is essential for the control of typhoid fever in endemic and epidemic settings as  
457 well as among travellers moving between non-endemic and endemic areas. The WHO  
458 recommends the programmatic use of typhoid fever vaccines in endemic areas<sup>4</sup>. We retrieved  
459 two studies<sup>73,104</sup> where the risk of typhoid fever was reduced among populations who had  
460 received effective typhoid vaccines and lived in households with better water, sanitation, and  
461 hygiene (WASH) conditions, Table 5. Conversely, poor vaccination coverage or the absence  
462 of vaccination with suboptimal WASH can exacerbate typhoid transmission in a given  
463 area<sup>61,101</sup>. Defective vaccine efficacy can result from various factors, including faulty batches,  
464 incorrect immunization procedures, or the interval since vaccination. In our study, we found  
465 evidence of ineffective vaccines increasing the risk of typhoid fever, particularly in  
466 individuals vaccinated more than three years prior<sup>92</sup>. This is due to vaccine waning as  
467 polysaccharide vaccines exhibit a cumulative efficacy of approximately 55% over three  
468 years, with significant protection observed primarily within the first two years post-  
469 immunization.

## 470 **Environmental, seasonal and climate factors**

471 Typhoid fever transmission exhibits distinct seasonal patterns influenced by environmental  
472 and climatic factors such as temperature, humidity, and precipitation. In this study, diverse  
473 peak risk periods have been identified in different endemic regions. While Taiwan registers a  
474 surge in cases during the fall (September-November) and winter seasons (December-  
475 February)<sup>84</sup>, in India, Allahabad experiences its peak in June<sup>22</sup>, with Ahmedabad seeing a  
476 spike during the monsoon season (July-November)<sup>75</sup>. Another study by Corner et al.<sup>54</sup>  
477 discovered that almost half of the yearly typhoid cases, reaching up to 11 per 100,000  
478 individuals in the Dhaka Metropolitan Area, occurred during summer and fall (July-October).  
479 Additionally, Srinivasan and colleagues<sup>101</sup> found a correlation between hot weather (summer  
480 i.e. June-August) and increased typhoid cases. These fluctuations stem from a complex  
481 interplay of climatic conditions, hygiene practices, and local cultural dynamics of an  
482 area<sup>84,138</sup>. For instance, during summer seasons or in regions with warmer temperatures, *S.*  
483 Typhi multiplication in contaminated foods is enhanced<sup>101</sup>, likewise, during colder  
484 temperature and humidity conditions, *S. Typhi* survive longer in water and soil<sup>139</sup>. These  
485 changes in climatic conditions together with increased human movement interact to drive  
486 typhoid fever infection in many endemic areas. Furthermore, heavy rainfall can trigger  
487 flooding, leading to the contamination of water sources through sewage overflow<sup>22,64</sup>  
488 exacerbating typhoid incidences. Similarly, increased precipitation associated with the rainy  
489 season may facilitate the spread of *S. Typhi* through water and food contamination<sup>75</sup>. In areas  
490 where surface water is relied upon for daily needs, such as low-lying areas, the risk is  
491 compounded during the rainy season due to sewage runoff<sup>40,54,55</sup>. Settlements situated in  
492 flood-prone or hydrological terrains, like river floodplains, face severe typhoid transmission  
493 risks, particularly during the rainy season<sup>65,76</sup>.

## 494 **Conclusion**

495 Identifying the risk factors contributing to typhoid fever is crucial for understanding and  
496 controlling its transmission. Effective prevention and control require addressing these factors  
497 by improving water and food quality, enhancing hygiene and sanitation, implementing mass  
498 vaccination programs, and promoting health education. Interventions targeting environmental  
499 and climate-related transmission are also essential for mitigating the risks associated with  
500 typhoid fever.

## 501 **Study limitation**

502 Risk of bias was not assessed and this study is limited to English language articles.

## 503 **Acknowledgement**

504 Special thanks to the EOD projects at Kwame Nkrumah University of Science in  
505 collaboration with the International Vaccine Institute for their support.

## 506 **References**

- 507 1. Crump JA, Sjölund-Karlsson M, Gordon MA, Parry CM. Epidemiology, clinical  
508 presentation, laboratory diagnosis, antimicrobial resistance, and antimicrobial management  
509 of invasive Salmonella infections. *Clinical microbiology reviews*. 2015;28(4):901-37.
- 510 2. Cunha BA. Osler on typhoid fever: differentiating typhoid from typhus and malaria.  
511 *Infectious Disease Clinics*. 2004;18(1):111-25.
- 512 3. Parry CM, Wijedoru L, Arjyal A, Baker S. The utility of diagnostic tests for enteric fever in  
513 endemic locations. *Expert review of anti-infective therapy*. 2011;9(6):711-25.

- 514 4. WHO. Typhoid vaccines: WHO position paper–March 2018–Vaccins antityphoïdiques:  
515 note de synthèse de l’OMS–mars 2018. *Weekly Epidemiological Record= Relevé*  
516 *épidémiologique hebdomadaire*. 2018;93(13):153-72.
- 517 5. Stuart BM, Pullen RL. Typhoid: clinical analysis of three hundred and sixty cases. *Archives*  
518 *of Internal Medicine*. 1946;78(6):629-61.
- 519 6. Crump JA, Luby SP, Mintz ED. The global burden of typhoid fever. *Bulletin of the World*  
520 *Health Organization*. 2004;82(5):346-53.
- 521 7. Buckle GC, Walker CLF, Black RE. Typhoid fever and paratyphoid fever: Systematic  
522 review to estimate global morbidity and mortality for 2010. *Journal of global health*.  
523 2012;2(1).
- 524 8. Stanaway JD, Reiner RC, Blacker BF, Goldberg EM, Khalil IA, Troeger CE, et al. The  
525 global burden of typhoid and paratyphoid fevers: a systematic analysis for the Global  
526 Burden of Disease Study 2017. *The Lancet Infectious Diseases*. 2019;19(4):369-81.
- 527 9. Marks F, Im J, Park SE, Pak GD, Jeon HJ, Nana LRW, et al. Incidence of typhoid fever in  
528 Burkina Faso, Democratic Republic of the Congo, Ethiopia, Ghana, Madagascar, and  
529 Nigeria (the Severe Typhoid in Africa programme): a population-based study. *The Lancet*  
530 *Global Health*. 2024;12(4):e599-e610.
- 531 10. WHO. Typhoid vaccines: WHO position paper, March 2018–Recommendations. *Vaccine*.  
532 2019;37(2):214-6.
- 533 11. Prasad N, Jenkins AP, Naucukidi L, Rosa V, Sahu-Khan A, Kama M, et al. Epidemiology  
534 and risk factors for typhoid fever in Central Division, Fiji, 2014–2017: a case-control study.  
535 *PLoS neglected tropical diseases*. 2018;12(6):e0006571.
- 536 12. Zubair OAR, Mohammad MY. Prevalent sources of enteric fevers among women in Mosul  
537 city. *Annals of Tropical Medicine and Public Health*. 2020;23.
- 538 13. Meftahuddin T. Review of the trends and causes of food borne outbreaks in Malaysia from  
539 1988 to 1997. *The Medical Journal of Malaysia*. 2002;57(1):70-9.
- 540 14. Lee J-S, Mogasale VV, Mogasale V, Lee K. Geographical distribution of typhoid risk  
541 factors in low and middle income countries. *BMC infectious diseases*. 2016;16:1-10.
- 542 15. Kim J-H, Choi J, Kim C, Pak GD, Parajulee P, Haselbeck A, et al. Mapping the incidence  
543 rate of typhoid fever in sub-Saharan Africa. *PLoS neglected tropical diseases*.  
544 2024;18(2):e0011902.
- 545 16. Brockett S, Wolfe MK, Hamot A, Appiah GD, Mintz ED, Lantagne D. Associations among  
546 water, sanitation, and hygiene, and food exposures and typhoid fever in Case–Control  
547 studies: a systematic review and meta-analysis. *The American journal of tropical medicine*  
548 *and hygiene*. 2020;103(3):1020.
- 549 17. Mogasale VV, Ramani E, Mogasale V, Park JY, Wierzba TF. Estimating typhoid fever risk  
550 associated with lack of access to safe water: a systematic literature review. *Journal of*  
551 *environmental and public health*. 2018;2018.
- 552 18. Ma PY, Tan JE, Hee EW, Yong DWX, Heng YS, Low WX, et al. Human genetic variation  
553 influences enteric fever progression. *Cells*. 2021;10(2):345.
- 554 19. Levantesi C, Bonadonna L, Briancesco R, Grohmann E, Toze S, Tandoi V. Salmonella in  
555 surface and drinking water: occurrence and water-mediated transmission. *Food Research*  
556 *International*. 2012;45(2):587-602.
- 557 20. Ouzzani M, Hammady H, Fedorowicz Z, Elmagarmid A. Rayyan—a web and mobile app  
558 for systematic reviews. *Systematic reviews*. 2016;5:1-10.
- 559 21. Akwa TE, Nguimbois SP. Investigation of typhoid fever and their associated risk factors in  
560 children attending “Deo Gratias” Hospital in Douala, Littoral, Cameroon. *Electronic Journal*  
561 *of Medical and Educational Technologies*. 2021;14(2):em2107.



- 562 22. Alajeely A, Lawrence R, Jeyakumar E, Maurice NG. Risk factors of Typhoid fever amongst  
563 patients in the Allahabad region, India. *International Journal of Current Research*.  
564 2014;6(11):10025-9.
- 565 23. Alba S, Bakker MI, Hatta M, Scheelbeek PF, Dwiyantri R, Usman R, et al. Risk factors of  
566 typhoid infection in the Indonesian archipelago. *PloS one*. 2016;11(6):e0155286.
- 567 24. Anita S, Amir K, Fadzilah K, Ahamad J, Noorhaida U, Marina K, et al. Risk factors for  
568 typhoid outbreak in Sungai Congkak recreational park, Selangor 2009. *Med J Malaysia*.  
569 2012;67(1):12-6.
- 570 25. Eba K, Bekele D. Prevalence of typhoid fever and its risk factors in Lalo Assabi District,  
571 West Wollega, Oromiya, Ethiopia. *Journal of Bacteriology & Parasitology*. 2019;10(1).
- 572 26. Fahad Javaid S, Syed Rizwan H. Risk factors for typhoid fever in children in squatter  
573 settlements of Karachi: a nested case-control study. 2008.
- 574 27. Gasem MH, Dolmans W, Keuter M, Djokomoeljanto R. Poor food hygiene and housing as  
575 risk factors for typhoid fever in Semarang, Indonesia. *Tropical Medicine & International  
576 Health*. 2001;6(6):484-90.
- 577 28. Halder S, Rahman ME, Sarker MM, Mone FH, Roy K, Tajkia G. Identification of Risk  
578 Factors for Typhoid Fever in Children Admitted in a Tertiary Care Hospital. 2021.
- 579 29. Hosoglu S, Celen M, Geyik M, Akalin S, Ayaz C, Acemoglu H, et al. Risk factors for  
580 typhoid fever among adult patients in Diyarbakir, Turkey. *Epidemiology & Infection*.  
581 2006;134(3):612-6.
- 582 30. Javed N, Abbasi S, Tahir M, Bashir F. Identifying the Risk Factors for Typhoid Fever  
583 among the Residents of Rural Islamabad. *Pakistan Journal of Medical Research*.  
584 2017;56(2).
- 585 31. Khan MI, Ochiai R, Soofi S, VON-SEIDLEIN L, Khan M, Sahito S, et al. Risk factors  
586 associated with typhoid fever in children aged 2–16 years in Karachi, Pakistan.  
587 *Epidemiology & Infection*. 2012;140(4):665-72.
- 588 32. Luby S, Faizan M, Fisher-Hoch S, Syed A, Mintz E, Bhutta Z, et al. Risk factors for  
589 typhoid fever in an endemic setting, Karachi, Pakistan. *Epidemiology & Infection*.  
590 1998;120(2):129-38.
- 591 33. Mustafa MAE. Association of VNTR polymorphism in intron3 of IL-4 gene and TNF $\alpha$ -308  
592 SNP and non-genetic risk factors with typhoid fever in Khartoum State, Sudan. 2016.
- 593 34. Rabasa A, Mava Y, Pius S, Timothy S, Baba U. Typhoid fever in children: clinical  
594 presentation and risk factors. *Nigerian Journal of Paediatrics*. 2013;40(1):60-3.
- 595 35. Ram P, Naheed A, Brooks W, Hossain M, Mintz E, Breiman R, et al. Risk factors for  
596 typhoid fever in a slum in Dhaka, Bangladesh. *Epidemiology & Infection*. 2007;135(3):458-  
597 65.
- 598 36. Sharma PK, Ramakrishnan R, Hutin Y, Manickam P, Gupte M. Risk factors for typhoid in  
599 Darjeeling, West Bengal, India: evidence for practical action. *Tropical Medicine &  
600 International Health*. 2009;14(6):696-702.
- 601 37. Jelinek T, Nothdurft H-D, von Sonnenburg F, Löscher T. Risk factors for typhoid fever in  
602 travelers. *Journal of Travel Medicine*. 1996;3(4):200-3.
- 603 38. Abera B, Yitayew G, Amare H. Salmonella serotype Typhi, Shigella, and intestinal parasites  
604 among food handlers at Bahir Dar University, Ethiopia. *The Journal of Infection in  
605 Developing Countries*. 2016;10(02):121-6.
- 606 39. Ackers M-L, Puhr ND, Tauxe RV, Mintz ED. Laboratory-based surveillance of Salmonella  
607 serotype Typhi infections in the United States: antimicrobial resistance on the rise. *Jama*.  
608 2000;283(20):2668-73.
- 609 40. Akullian A, Ng'eno E, Matheson AI, Cosmas L, Macharia D, Fields B, et al. Environmental  
610 transmission of typhoid fever in an urban slum. *PLoS neglected tropical diseases*.  
611 2015;9(12):e0004212.

- 612 41. Anand P, Ramakrishnan R. Investigation of the outbreak of typhoid in a village of Thar  
613 Desert Rajasthan, India. *Indian Journal of Medical Research*. 2010;131(6):799-803.
- 614 42. Anderson E, Smith H. Chloramphenicol resistance in the typhoid bacillus. *Br Med J*.  
615 1972;3(5822):329-31.
- 616 43. Batool R, Qureshi S, Yousafzai MT, Kazi M, Ali M, Qamar FN. Risk factors associated  
617 with extensively drug-resistant typhoid in an outbreak setting of Lyari Town Karachi,  
618 Pakistan. *The American journal of tropical medicine and hygiene*. 2022;106(5):1379.
- 619 44. Samaridin A, Akhmedov M. Epidemic Typhoid Fever--Dushanbe, Tajikistan, 1997.  
620 *MMWR: Morbidity & Mortality Weekly Report*. 1998;47(36):752-6.
- 621 45. Srikantiah P, Vafokulov S, Luby SP, Ishmail T, Earhart K, Khodjaev Nm, et al.  
622 Epidemiology and risk factors for endemic typhoid fever in Uzbekistan. *Tropical Medicine  
623 & International Health*. 2007;12(7):838-47.
- 624 46. Tran H, BJune G, Nguyen B, Rottingen J, Grais R, Guerin P. Risk factors associated with  
625 typhoid fever in Son La province, northern Vietnam. *Transactions of the Royal Society of  
626 Tropical Medicine and Hygiene*. 2005;99(11):819-26.
- 627 47. Bhan MK, Bahl R, Sazawal S, Sinha A, Kumar R, Mahalanabis D, et al. Association  
628 between *Helicobacter pylori* infection and increased risk of typhoid fever. *The Journal of  
629 infectious diseases*. 2002;186(12):1857-60.
- 630 48. Birkhead GS, Morse DL, Levine WC, Fudala JK, Kondracki SF, Chang H-G, et al. Typhoid  
631 fever at a resort hotel in New York: a large outbreak with an unusual vehicle. *Journal of  
632 Infectious Diseases*. 1993;167(5):1228-32.
- 633 49. Boggild AK, Castelli F, Gautret P, Torresi J, von Sonnenburg F, Barnett ED, et al. Vaccine  
634 preventable diseases in returned international travelers: results from the GeoSentinel  
635 Surveillance Network. *Vaccine*. 2010;28(46):7389-95.
- 636 50. Braddick M, Sharp J. Enteric fever in Scotland 1975–1990. *Public health*. 1993;107(3):193-  
637 8.
- 638 51. Brainard J, D'hondt R, Ali E, Van den Bergh R, De Weggheleire A, Baudot Y, et al.  
639 Typhoid fever outbreak in the Democratic Republic of Congo: Case control and ecological  
640 study. *PLoS neglected tropical diseases*. 2018;12(10):e0006795.
- 641 52. Chao D, Park J, Marks F, Ochiai R, Longini I, Halloran M. The contribution of neighbours  
642 to an individual's risk of typhoid outcome. *Epidemiology & Infection*. 2015;143(16):3520-  
643 7.
- 644 53. Clark ST, Cronin K, Corbeil AJ, Patel SN. A ten-year retrospective survey of antimicrobial  
645 susceptibility patterns among *Salmonella enterica* subsp. *enterica* serovar typhi isolates in  
646 Ontario, Canada. *Microbiology Spectrum*. 2023;11(1):e04828-22.
- 647 54. Corner RJ, Dewan AM, Hashizume M. Modelling typhoid risk in Dhaka Metropolitan Area  
648 of Bangladesh: the role of socio-economic and environmental factors. *International journal  
649 of health geographics*. 2013;12:1-15.
- 650 55. de Alwis R, Watson C, Nikolay B, Lowry JH, Thieu NTV, Van TT, et al. Role of  
651 environmental factors in shaping spatial distribution of *Salmonella enterica* serovar Typhi,  
652 Fiji. *Emerging infectious diseases*. 2018;24(2):284.
- 653 56. Deksisssa T, Gebremedhin EZ. A cross-sectional study of enteric fever among febrile  
654 patients at Ambo hospital: prevalence, risk factors, comparison of Widal test and stool  
655 culture and antimicrobials susceptibility pattern of isolates. *BMC infectious diseases*.  
656 2019;19:1-12.
- 657 57. Ekdahl K, de Jong B, Andersson Y. Risk of travel-associated typhoid and paratyphoid  
658 fevers in various regions. *Journal of travel medicine*. 2005;12(4):197-204.
- 659 58. Elemfareji OI, Thong KL. Comparative Virulotyping of *Salmonella typhi* and *Salmonella  
660 enteritidis*. *Indian journal of microbiology*. 2013;53:410-7.

- 661 59. Farmakiotis D, Varughese J, Sue P, Andrews P, Brimmage M, Dobroszycki J, et al.  
662 Typhoid fever in an inner city hospital: A 5-year retrospective review. *Journal of travel*  
663 *medicine*. 2013;20(1):17-21.
- 664 60. Feasey NA, Masesa C, Jassi C, Faragher EB, Mallewa J, Mallewa M, et al. Three epidemics  
665 of invasive multidrug-resistant *Salmonella* bloodstream infection in Blantyre, Malawi,  
666 1998–2014. *Clinical Infectious Diseases*. 2015;61(suppl\_4):S363-S71.
- 667 61. Fida S, Mansoor H, Saif S, Iqbal J, Khan AQ. Clinical Perspectives of Multiple and  
668 Extensively Drug-Resistant Typhoid; result from a tertiary care hospital from Pakistan. *The*  
669 *Journal of Infection in Developing Countries*. 2021;15(04):530-7.
- 670 62. Forster DP, Leder K. Typhoid fever in travellers: estimating the risk of acquisition by  
671 country. *Journal of Travel Medicine*. 2021;28(8):taab150.
- 672 63. Forsyth J, Bennett NM, Hogben S, Hutchinson E, Rouch G, Tan A, et al. The year of the  
673 *Salmonella* seekers—1977. *Australian and New Zealand journal of public health*.  
674 2003;27(4):385-9.
- 675 64. Gao Q, Liu Z, Xiang J, Zhang Y, Tong MX, Wang S, et al. Impact of temperature and  
676 rainfall on typhoid/paratyphoid fever in Taizhou, China: effect estimation and vulnerable  
677 group identification. *The American Journal of Tropical Medicine and Hygiene*.  
678 2022;106(2):532.
- 679 65. Gauld JS, Olgemoeller F, Heinz E, Nkhata R, Bilima S, Wailan AM, et al. Spatial and  
680 genomic data to characterize endemic typhoid transmission. *Clinical Infectious Diseases*.  
681 2022;74(11):1993-2000.
- 682 66. Gauld JS, Olgemoeller F, Nkhata R, Li C, Chirambo A, Morse T, et al. Domestic river  
683 water use and risk of typhoid fever: results from a case-control study in Blantyre, Malawi.  
684 *Clinical Infectious Diseases*. 2020;70(7):1278-84.
- 685 67. Geteneh A, Tadesse S, Biset S, Girma L, Fissiha P. Rapid stool antigenic test for typhoid  
686 fever among suspected cases, Northeast, Ethiopia. *Scientific Reports*. 2023;13(1):649.
- 687 68. Giri S, Mohan VR, Srinivasan M, Kumar N, Kumar V, Dhanapal P, et al. Case-control  
688 study of household and environmental transmission of typhoid fever in India. *The Journal*  
689 *of infectious diseases*. 2021;224(Supplement\_5):S584-S92.
- 690 69. Gotuzzo E, Frisancho O, Sanchez J, Liendo G, Carrillo C, Black RE, et al. Association  
691 between the acquired immunodeficiency syndrome and infection with *Salmonella typhi* or  
692 *Salmonella paratyphi* in an endemic typhoid area. *Archives of Internal Medicine*.  
693 1991;151(2):381-2.
- 694 70. Grist N, Emslie J. Infections in British clinical laboratories, 1988-1989. *Journal of clinical*  
695 *pathology*. 1991;44(8):667-9.
- 696 71. Gunaratnam P, Tobin S, Seale H, McAnulty JM. Infectious diseases in returned travellers,  
697 NSW, 2010–2011. *New South Wales Public Health Bulletin*. 2014;24(4):171-5.
- 698 72. Im J, Islam MT, Ahmmed F, Kim DR, Islam Khan A, Zaman K, et al. Can existing  
699 improvements of water, sanitation, and hygiene (WASH) in urban slums reduce the burden  
700 of typhoid fever in these settings? *Clinical Infectious Diseases*. 2021;72(11):e720-e6.
- 701 73. Im J, Khanam F, Ahmmed F, Kim DR, Kang S, Tadesse BT, et al. Prevention of Typhoid  
702 Fever by Existing Improvements in Household Water, Sanitation, and Hygiene, and the Use  
703 of the Vi Polysaccharide Typhoid Vaccine in Poor Urban Slums: Results from a Cluster-  
704 Randomized Trial. *The American Journal of Tropical Medicine and Hygiene*.  
705 2022;106(4):1149.
- 706 74. Issack MI. Epidemiology of typhoid fever in Mauritius. *Journal of travel medicine*.  
707 2005;12(5):270-4.
- 708 75. Iyer V, Sharma A, Nair D, Solanki B, Umrigar P, Murtugudde R, et al. Role of extreme  
709 weather events and El Niño Southern oscillation on incidence of enteric fever in  
710 Ahmedabad and Surat, Gujarat, India. *Environmental research*. 2021;196:110417.

- 711 76. Jenkins AP, Jupiter S, Mueller U, Jenney A, Vosaki G, Rosa V, et al. Health at the sub-  
712 catchment scale: typhoid and its environmental determinants in Central Division, Fiji.  
713 *EcoHealth*. 2016;13:633-51.
- 714 77. Jenkins AP, Jupiter SD, Jenney A, Rosa V, Naucukidi A, Prasad N, et al. Environmental  
715 foundations of typhoid fever in the Fijian residential setting. *International Journal of*  
716 *Environmental Research and Public Health*. 2019;16(13):2407.
- 717 78. Kabwama SN, Bulage L, Nsubuga F, Pande G, Oguttu DW, Mafigiri R, et al. A large and  
718 persistent outbreak of typhoid fever caused by consuming contaminated water and street-  
719 vended beverages: Kampala, Uganda, January–June 2015. *BMC Public Health*. 2017;17:1-  
720 9.
- 721 79. Kamal R, Ching C, Zaman MH, Sultan F, Abbas S, Khan E, et al. Identification of multiple  
722 variant extensively drug-resistant typhoid infections across Pakistan. *The American Journal*  
723 *of Tropical Medicine and Hygiene*. 2023;108(2):278-84.
- 724 80. Karkey A, Arjyal A, Anders KL, Boni MF, Dongol S, Koirala S, et al. The burden and  
725 characteristics of enteric fever at a healthcare facility in a densely populated area of  
726 Kathmandu. *PloS one*. 2010;5(11):e13988.
- 727 81. Karkey A, Thompson CN, Tran Vu Thieu N, Dongol S, Le Thi Phuong T, Voong Vinh P, et  
728 al. Differential epidemiology of *Salmonella* Typhi and Paratyphi A in Kathmandu, Nepal: a  
729 matched case control investigation in a highly endemic enteric fever setting. *PLoS*  
730 *neglected tropical diseases*. 2013;7(8):e2391.
- 731 82. Katz DJ, Cruz MA, Trepka MJ, Suarez JA, Fiorella PD, Hammond RM. An outbreak of  
732 typhoid fever in Florida associated with an imported frozen fruit. *The Journal of infectious*  
733 *diseases*. 2002;186(2):234-9.
- 734 83. Keller A, Frey M, Schmid H, Steffen R, Walker T, Schlagenhauf P. Imported typhoid fever  
735 in Switzerland, 1993 to 2004. *Journal of travel medicine*. 2008;15(4):248-51.
- 736 84. Lin F-H, Chen B-C, Chou Y-C, Hsieh C-J, Yu C-P, editors. Incidence and risk factors for  
737 notifiable typhoid and paratyphoid in Taiwan during the period 2011–2020. *Healthcare*;  
738 2021: MDPI.
- 739 85. Liu Z, Lao J, Zhang Y, Liu Y, Zhang J, Wang H, et al. Association between floods and  
740 typhoid fever in Yongzhou, China: effects and vulnerable groups. *Environmental research*.  
741 2018;167:718-24.
- 742 86. Luxemburger C, Duc CM, Lanh MN, Wain J, Hien TT, Simpson JA, et al. Risk factors for  
743 typhoid fever in the Mekong delta, southern Viet Nam: a case-control study. *Transactions of*  
744 *the Royal Society of Tropical Medicine and Hygiene*. 2001;95(1):19-23.
- 745 87. Makungo UB, Ramutshila TE, Maboŋja MC, Thomas J, Lekalakala-Mokaba R, Smith AM,  
746 et al. Epidemiological investigation of a typhoid fever outbreak in Sekhukhune District,  
747 Limpopo province, South Africa–2017. *Southern African Journal of Infectious Diseases*.  
748 2020;35(1).
- 749 88. Masinaei M, Eshrati B, Yaseri M. Spatial and spatiotemporal patterns of typhoid fever and  
750 investigation of their relationship with potential risk factors in Iran, 2012–2017.  
751 *International journal of hygiene and environmental health*. 2020;224:113432.
- 752 89. Mathieu JJ, Henning KJ, Bell E, Frieden TR. Typhoid fever in New York city, 1980  
753 through 1990. *Archives of internal medicine*. 1994;154(15):1713-8.
- 754 90. Mbae C, Mwangi M, Gitau N, Irungu T, Muendo F, Wakio Z, et al. Factors associated with  
755 occurrence of salmonellosis among children living in Mukuru slum, an urban informal  
756 settlement in Kenya. *BMC Infectious Diseases*. 2020;20:1-12.
- 757 91. Mermin JH, Townes JM, Gerber M, Dolan N, Mintz ED, Tauxe RV. Typhoid fever in the  
758 United States, 1985-1994: changing risks of international travel and increasing  
759 antimicrobial resistance. *Archives of Internal Medicine*. 1998;158(6):633-8.



- 760 92. Michel R, Garnotel E, Spiegel A, Morillon M, Saliou P, Boutin J-P. Outbreak of typhoid  
761 fever in vaccinated members of the French Armed Forces in the Ivory Coast. *European*  
762 *journal of epidemiology*. 2005;20:635-42.
- 763 93. Mohan VR, Srinivasan M, Sinha B, Shrivastava A, Kanungo S, Natarajan Sindhu K, et al.  
764 Geographically weighted regression modeling of spatial clustering and determinants of  
765 focal typhoid fever incidence. *The Journal of Infectious Diseases*.  
766 2021;224(Supplement\_5):S601-S11.
- 767 94. Muti M, Gombe N, Tshimanga M, Takundwa L, Bangure D, Mungofa S, et al. Typhoid  
768 outbreak investigation in Dzivaresekwa, suburb of Harare City, Zimbabwe, 2011. *Pan*  
769 *African Medical Journal*. 2014;18(1).
- 770 95. Nyamusore J, Nahimana MR, Ngoc CT, Olu O, Isiaka A, Ndahindwa V, et al. Risk factors  
771 for transmission of *Salmonella* Typhi in Mahama refugee camp, Rwanda: a matched case-  
772 control study. *Pan African Medical Journal*. 2018;29(1):1-13.
- 773 96. Okpasuo OJ, Aguzie IO, Joy AT, Okafor FC. Risk assessment of waterborne infections in  
774 Enugu State, Nigeria: Implications of household water choices, knowledge, and practices.  
775 *AIMS Public Health*. 2020;7(3):634.
- 776 97. Pommelet V, Mariani P, Basmaci R, Tourdjman M, Morin L, Gaschignard J, et al. Enteric  
777 fever among children: 50 cases in a French tertiary care centre. *Journal of travel medicine*.  
778 2018;25(1):tay059.
- 779 98. Pradier C, Keita-Perse O, Bernard E, Gisbert C, Vezolles M, Armengaud A, et al. Outbreak  
780 of typhoid fever on the French Riviera. *European Journal of Clinical Microbiology and*  
781 *Infectious Diseases*. 2000;19:464-7.
- 782 99. Qamar FN, Yousafzai MT, Khalid M, Kazi AM, Lohana H, Karim S, et al. Outbreak  
783 investigation of ceftriaxone-resistant *Salmonella enterica* serotype Typhi and its risk factors  
784 among the general population in Hyderabad, Pakistan: a matched case-control study. *The*  
785 *Lancet Infectious Diseases*. 2018;18(12):1368-76.
- 786 100. Ren X, Zhang S, Luo P, Zhao J, Kuang W, Ni H, et al. Spatial heterogeneity of socio-  
787 economic determinants of typhoid/paratyphoid fever in one province in central China from  
788 2015 to 2019. *BMC Public Health*. 2023;23(1):927.
- 789 101. Srinivasan M, Sindhu KN, Kumar JS, Ramasamy RK, Pragasam AK, Aasaithampi P, et al.  
790 Outbreak of typhoid fever in children of urban Vellore: a report from the surveillance for  
791 enteric fever in India cohort. *The American Journal of Tropical Medicine and Hygiene*.  
792 2022;107(1):82.
- 793 102. Sur D, Ali M, Von Seidlein L, Manna B, Deen JL, Acosta CJ, et al. Comparisons of  
794 predictors for typhoid and paratyphoid fever in Kolkata, India. *BMC public health*.  
795 2007;7:1-10.
- 796 103. Sutiono AB, Qiantori A, Suwa H, Ohta T. Characteristics and risk factors for typhoid fever  
797 after the tsunami, earthquake and under normal conditions in Indonesia. *BMC Research*  
798 *Notes*. 2010;3:1-9.
- 799 104. Tadesse BT, Khanam F, Ahmmed F, Im J, Islam MT, Kim DR, et al. Prevention of typhoid  
800 by Vi conjugate vaccine and achievable improvements in household water, sanitation, and  
801 hygiene: evidence from a cluster-randomized trial in Dhaka, Bangladesh. *Clinical Infectious*  
802 *Diseases*. 2022;75(10):1681-7.
- 803 105. Vighio A, Syed MA, Hussain I, Zia SM, Fatima M, Masood N, et al. Risk factors of  
804 extensively drug resistant typhoid fever among children in Karachi: case-control study.  
805 *JMIR Public Health and Surveillance*. 2021;7(5):e27276.
- 806 106. Vollaard A, Ali S, Van Asten H, Ismid IS, Widjaja S, Visser L, et al. Risk factors for  
807 transmission of foodborne illness in restaurants and street vendors in Jakarta, Indonesia.  
808 *Epidemiology & Infection*. 2004;132(5):863-72.

- 809 107. Vollaard AM, Verspaget HW, Ali S, Visser LG, Veenendaal RA, van Asten HA, et al.  
810 *Helicobacter pylori* infection and typhoid fever in Jakarta, Indonesia. *Epidemiology &*  
811 *Infection*. 2006;134(1):163-70.
- 812 108. Wang J-F, Wang Y, Zhang J, Christakos G, Sun J-L, Liu X, et al. Spatiotemporal  
813 transmission and determinants of typhoid and paratyphoid fever in Hongta District, Yunnan  
814 Province, China. *PLoS neglected tropical diseases*. 2013;7(3):e2112.
- 815 109. Wang L-x, Li X-J, Fang L-Q, Wang D-C, Cao W-C, Biao K. Association between the  
816 incidence of typhoid and paratyphoid fever and meteorological variables in Guizhou, China.  
817 *Chinese medical journal*. 2012;125(3):455-60.
- 818 110. Afifi S, Earhart K, Azab MA, Youssef FG, El Sakka H, Wasfy M, et al. Hospital-based  
819 surveillance for acute febrile illness in Egypt: a focus on community-acquired bloodstream  
820 infections. *American journal of tropical medicine and hygiene*. 2005;73(2):392-9.
- 821 111. Bendib A, Dridi H, Kalla M, Baziz N. Spatial analysis of typhoid fever vulnerability in the  
822 city of Batna (eastern Algeria). *Environnement, Risques & Santé*. 2016;15(3):228-37.
- 823 112. Coté TR, Convery H, Robinson D, Ries A, Barrett T, Frank L, et al. Typhoid fever in the  
824 park: epidemiology of an outbreak at a cultural interface. *Journal of Community Health*.  
825 1995;20:451-8.
- 826 113. Kelly-Hope LA, Alonso WJ, Thiem VD, Anh DD, Canh DG, Lee H, et al. Geographical  
827 distribution and risk factors associated with enteric diseases in Vietnam. *American Journal*  
828 *of Tropical Medicine and Hygiene*. 2007;76(4):706-12.
- 829 114. Khatami A, Khan F, Macartney KK. Enteric fever in children in western Sydney, Australia,  
830 2003–2015. *The Pediatric infectious disease journal*. 2017;36(12):1124-8.
- 831 115. Salama RI, Emara MH, Mostafa HM, Abd-Elsalam S, Alnabawy SM, Elshweikh SA, et al.  
832 *Helicobacter pylori* infection and risk of salmonella infection. *Medicine*.  
833 2019;98(6):e14335.
- 834 116. Stroffolini T, Manzillo G, De Sena R, Manzillo E, Pagliano P, Zaccarelli M, et al. Typhoid  
835 fever in the Neapolitan area: a case-control study. *European journal of epidemiology*.  
836 1992;8:539-42.
- 837 117. Yousafzai MT, Qamar FN, Shakoor S, Saleem K, Lohana H, Karim S, et al. Ceftriaxone-  
838 resistant *Salmonella* Typhi outbreak in Hyderabad City of Sindh, Pakistan: high time for the  
839 introduction of typhoid conjugate vaccine. *Clinical Infectious Diseases*.  
840 2019;68(Supplement\_1):S16-S21.
- 841 118. Tawfiq UA, Shohaimi S, Nordin SA, Nadzir MNHM, Ab Rahman AH, Salari N.  
842 Epidemiology and Risk Factors for Typhoid Fever in Gombe Metropolis, Gombe State,  
843 Nigeria. *Malaysian Journal of Public Health Medicine*. 2022;22(2):110-21.
- 844 119. Titus I, Iliyasu M, Sahal M, Umar R, Wali M, Ismai S, et al. Phenotypic Characterization of  
845 Virulence Factors in Multidrug-Resistant *Salmonella* typhi Serovars Isolated from Clinical  
846 Specimens in Bauchi Metropolis. 2023.
- 847 120. Velema JP, Van Wijnen G, Bult P, Van Naerssen T, Jota S. Typhoid fever in Ujung  
848 Pandang, Indonesia—high risk groups and high risk behaviours. *Tropical Medicine &*  
849 *International Health*. 1997;2(11):1088-94.
- 850 121. Vollaard AM, Ali S, Van Asten HA, Widjaja S, Visser LG, Surjadi C, et al. Risk factors for  
851 typhoid and paratyphoid fever in Jakarta, Indonesia. *Jama*. 2004;291(21):2607-15.
- 852 122. Dunstan SJ, Hue NT, Rockett K, Forton J, Morris AP, Diakite M, et al. A TNF region  
853 haplotype offers protection from typhoid fever in Vietnamese patients. *Human genetics*.  
854 2007;122:51-61.
- 855 123. Steinberg E, Bishop R, Haber P, Dempsey A, Hoekstra R, Nelson J, et al. Typhoid fever in  
856 travelers: who should be targeted for prevention? *Clinical infectious diseases*.  
857 2004;39(2):186-91.

- 858 124. Antillón M, Warren JL, Crawford FW, Weinberger DM, Kürüm E, Pak GD, et al. The  
859 burden of typhoid fever in low-and middle-income countries: a meta-regression approach.  
860 PLoS neglected tropical diseases. 2017;11(2):e0005376.
- 861 125. Anonymous. Typhoid in the large cities of the United States in 1919: eighth annual report.  
862 JAMA. 1920;74:672-5.
- 863 126. UNICEF. WHO, Progress on Drinking Water and Sanitation. Available at:  
864 <https://reliefwebint/report/world/progress-drinking-water-and-sanitation-2012> Accessed 8  
865 February 2024. 2012.
- 866 127. Ercumen A, Arnold BF, Kumpel E, Burt Z, Ray I, Nelson K, et al. Upgrading a piped water  
867 supply from intermittent to continuous delivery and association with waterborne illness: a  
868 matched cohort study in urban India. PLoS medicine. 2015;12(10):e1001892.
- 869 128. Karkey A, Jombart T, Walker AW, Thompson CN, Torres A, Dongol S, et al. The  
870 ecological dynamics of fecal contamination and Salmonella Typhi and Salmonella  
871 Paratyphi A in municipal Kathmandu drinking water. PLoS neglected tropical diseases.  
872 2016;10(1):e0004346.
- 873 129. Feglo P, Frimpong E, Essel-Ahun M. Salmonellae carrier status of food vendors in Kumasi,  
874 Ghana. East African medical journal. 2004;81(7):358-61.
- 875 130. Parry CM. Epidemiological and clinical aspects of human typhoid fever. Salmonella  
876 infections: Clinical, immunological and molecular aspects. 2006:1-18.
- 877 131. Rasul F, Sughra K, Mushtaq A, Zeeshan N, Mehmood S, Rashid U. Surveillance report on  
878 typhoid fever epidemiology and risk factor assessment in district Gujrat, Punjab, Pakistan.  
879 Biomedical Research. 2017;28(8):1-6.
- 880 132. Parry CM, Karunanayake L, Coulter JBS, Beeching NJ. Test for quinolone resistance in  
881 typhoid fever. BMJ. 2006;333(7561):260.
- 882 133. Gunn JS, Marshall JM, Baker S, Dongol S, Charles RC, Ryan ET. Salmonella chronic  
883 carriage: epidemiology, diagnosis, and gallbladder persistence. Trends in microbiology.  
884 2014;22(11):648-55.
- 885 134. Gupta V, Kaur M, Datta P, Chander J. Chronic urinary carrier state due to Salmonella Typhi  
886 causing urinary tract infection in an immunocompetent healthy woman. Tropical Doctor.  
887 2018;48(3):236-8.
- 888 135. Amsalu T, Genet C, Adem Siraj Y. Salmonella Typhi and S almonella Paratyphi  
889 prevalence, antimicrobial susceptibility profile and factors associated with enteric fever  
890 infection in Bahir Dar, Ethiopia. Scientific Reports. 2021;11(1):7359.
- 891 136. Clemens J, Albert MJ, Rao M, Qadri F, Huda S, Kay B, et al. Impact of infection by  
892 Helicobacter pylori on the risk and severity of endemic cholera. Journal of Infectious  
893 Diseases. 1995;171(6):1653-6.
- 894 137. Passaro DJ, Taylor DN, Meza R, Cabrera L, Gilman RH, Parsonnet J. Acute Helicobacter  
895 pylori infection is followed by an increase in diarrheal disease among Peruvian children.  
896 Pediatrics. 2001;108(5):e87-e.
- 897 138. Saad NJ, Lynch VD, Antillón M, Yang C, Crump JA, Pitzer VE. Seasonal dynamics of  
898 typhoid and paratyphoid fever. Scientific reports. 2018;8(1):6870.
- 899 139. Butler T, Mahmoud A, Warren K. Algorithms in the diagnosis and management of exotic  
900 diseases. XXIII. Typhoid fever. The Journal of Infectious Diseases. 1977;135(6):1017-20.

## 901 **Author contributions**

902 The study was conceived by EOD and PBO, with PBO leading the development of the  
903 review protocol. EOD, SN, and STA reviewed the protocol before its registration with OSF.  
904 PBO conducted the literature search, screened titles and abstracts, reviewed full texts, and  
905 performed data extraction. Any discrepancies were resolved collaboratively by EOD, SN, and  
906 STA, who also reviewed the final dataset. PBO and STA carried out data analyses. All

907 authors contributed to the manuscript's drafting, reviewing and editing for publication. All  
 908 authors agreed and approved the final manuscript for publication.

## 909 Supporting information

910 **S1 Table 1.** Summary of study characteristics

911 **S1 Table 2.** Distribution of transmission routes and common risk factors for typhoid

912 **S2.** Data extraction entities to: Risk factors for typhoid fever, a desk review.

## 913 Competing interest

914 The authors declared that no competing interests exist.

## 915 Funding

916 Authors received no specific funding for this work.

917

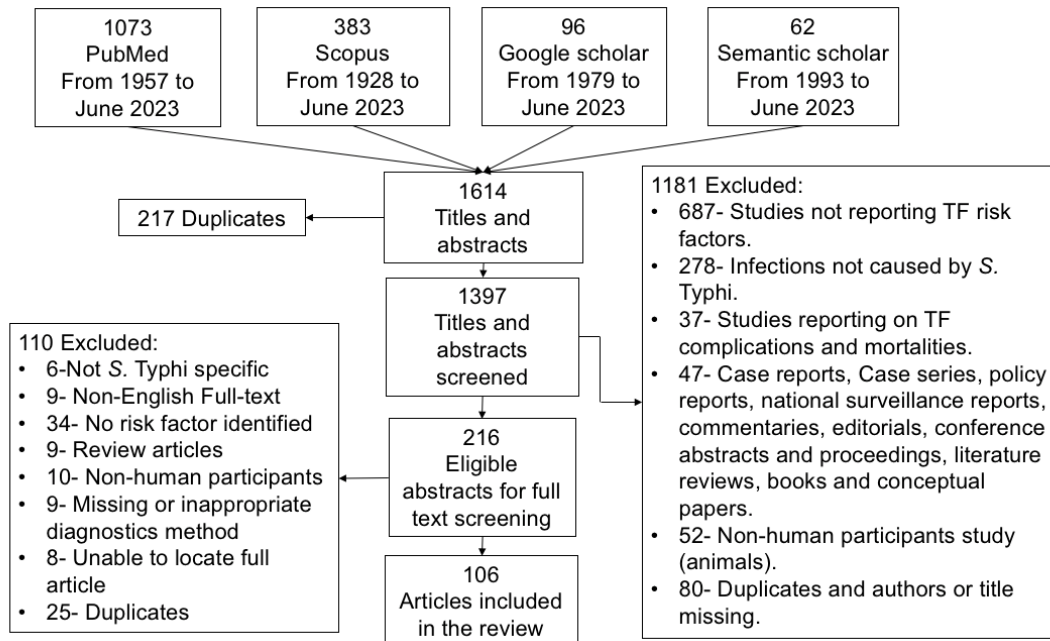

918

919 Figure 1: Desk review flow diagram of search strategies and selection of articles for risk  
 920 factors for typhoid fever, in June 2023.

921

922 Table 1. Risk factors suggesting waterborne transmission of typhoid fever

| Common factors            | Specific risk factors                                                                                                                                                                                                                                                                                                                                                                                                                                                                                                     |
|---------------------------|---------------------------------------------------------------------------------------------------------------------------------------------------------------------------------------------------------------------------------------------------------------------------------------------------------------------------------------------------------------------------------------------------------------------------------------------------------------------------------------------------------------------------|
| Water sources             | Household sources of drinking water <sup>21,56</sup> , having multiple drinking water sources <sup>66</sup> , using water from other sources than the municipal water networks for bathing, brushing teeth or drinking <sup>110</sup> , primary water sources with unpleasant smell <sup>35</sup> , obtaining water from an outside tap <sup>44</sup> , unsafe water source <sup>51,113</sup> , obtaining water from municipal pipe for drinking <sup>105</sup> , obtaining water from a river/stream <sup>11,113</sup> . |
| Water supply              | Water supplied by an outdated gravity-fed network <sup>51</sup> , Intermittent water availability <sup>11</sup> , inadequate safe water supply <sup>13</sup> , defective water systems <sup>111</sup> , household water supply from public wells and boreholes or merchants <sup>96</sup> , water from a community <sup>32</sup> , water from government overhead tanks <sup>41</sup> .                                                                                                                                   |
| Contaminated/unsafe water | Drinking unsafe/contaminated water <sup>24,31,61,77,93</sup> , using substandard water <sup>81</sup> , <i>E. coli</i> in stored drinking water <sup>77</sup> , water sold in small plastic                                                                                                                                                                                                                                                                                                                                |



|                 |                                                                                                                                                                                                                                                                                                                                                                                                                                                                                                    |
|-----------------|----------------------------------------------------------------------------------------------------------------------------------------------------------------------------------------------------------------------------------------------------------------------------------------------------------------------------------------------------------------------------------------------------------------------------------------------------------------------------------------------------|
|                 | bags <sup>78</sup> , use of ice cubes from a street vendor <sup>27,121</sup> .                                                                                                                                                                                                                                                                                                                                                                                                                     |
| Untreated water | Drinking water from a well <sup>94</sup> , untreated household drinking water <sup>35,44-46,68,118</sup> , use of untreated public water after rains <sup>30</sup> , drinking water from untreated open sources <sup>11,25,87</sup> , drinking water at the work site <sup>32</sup> , use of bore water <sup>105</sup> , Accidental ingestion of contaminated river water during swimming and/or bathing <sup>24</sup> , cooking and cleaning with river water or an open dug well <sup>66</sup> . |
| Water storage   | Storing water in plastic containers without a lid <sup>96</sup> , Not storing water for drinking in a narrow-mouthed container <sup>36</sup> , not using tipped containers to draw water <sup>36</sup> , water sold in small plastic bags <sup>78</sup> .                                                                                                                                                                                                                                          |

923

924 Table 2. Risk factors suggesting foodborne transmission of typhoid fever

| Common factors                 | Specific risk factors                                                                                                                                                                                                                                                                                                                                                                                                                                                                                                                                                                                                     |
|--------------------------------|---------------------------------------------------------------------------------------------------------------------------------------------------------------------------------------------------------------------------------------------------------------------------------------------------------------------------------------------------------------------------------------------------------------------------------------------------------------------------------------------------------------------------------------------------------------------------------------------------------------------------|
| Street stall/restaurant food   | Eating out from commercial food stalls/restaurants/mobile food vendors in the street/outside home <sup>23,32,43,89,99,120</sup> , eating outdoors at least once a week <sup>27,28,115</sup> , eating food from a roadside cabin during the summer <sup>32</sup> , mothers eating food from street vendors <sup>68</sup> , eating cold beverages outside home <sup>43</sup> , not dining at a tea-house <sup>45</sup> , consuming French fries with sauce and poppadum from street vendors <sup>105</sup> , eating commercially available foods or drinks <sup>118</sup> , eating food at community market <sup>95</sup> . |
| Poor food hygiene              | Eating unwashed farm produced <sup>11</sup> , unwashed guavas <sup>36</sup> , not washing vegetables before eating <sup>45</sup> .                                                                                                                                                                                                                                                                                                                                                                                                                                                                                        |
| Food handlers                  | Consuming food items from vendors <sup>106,120</sup> , male food handlers <sup>38</sup> , consuming food with the mother's or caregiver's assistance <sup>28</sup> , drinking orange juice with hand contact <sup>48</sup> , poor/unhygienic food handling practices/procedures <sup>13,98</sup> , eating food prepared at home <sup>95</sup> .                                                                                                                                                                                                                                                                           |
| Salads/other contaminated food | Eating contaminated foods <sup>61</sup> , including cucumber salad <sup>92</sup> , consumption of potato salad <sup>112</sup> , lettuce salad <sup>29</sup> , and raw salads (onion, cucumber, tomato) <sup>101</sup> .                                                                                                                                                                                                                                                                                                                                                                                                   |
| Uncooked/raw food              | Eating raw traditional foods like cig kofte <sup>29</sup> , raw onions and cabbage <sup>36</sup> , raw milk and meat <sup>56</sup> , uncooked shellfish <sup>116</sup> , intake of papaya <sup>35</sup> , unwashed guava <sup>36</sup> .                                                                                                                                                                                                                                                                                                                                                                                  |
| Frozen food                    | Eating of ice-cream <sup>28,32,47</sup> , ingesting ice cubes in beverages <sup>27</sup> , consumption of frozen tropical fruit (mamey) shakes <sup>82</sup> , fresh ice cream during the hot season <sup>12</sup> .                                                                                                                                                                                                                                                                                                                                                                                                      |
| Milk products                  | Eating butter and yoghurt <sup>36</sup> , fresh yoghurt made from cow and sheep in the summer <sup>12</sup> and homemade cheese <sup>12</sup> .                                                                                                                                                                                                                                                                                                                                                                                                                                                                           |
| Local/traditional food         | Consuming locally-made beverages <sup>78</sup> , eating locally prepared popsicles <sup>101</sup> , consuming locally prepared flavoured beverages <sup>101</sup> .                                                                                                                                                                                                                                                                                                                                                                                                                                                       |
| Others                         | Eating food brought by relatives from endemic areas <sup>89</sup> , sharing food from the same plate <sup>121</sup> , sharing food plates <sup>51</sup> .                                                                                                                                                                                                                                                                                                                                                                                                                                                                 |

925

926 Table 3. Socio-economic and housing factors indicating typhoid fever risk.

| Common factors                     | Specific risk factors                                                                                                                                                                                                                                                                                                                                                                     |
|------------------------------------|-------------------------------------------------------------------------------------------------------------------------------------------------------------------------------------------------------------------------------------------------------------------------------------------------------------------------------------------------------------------------------------------|
| Demographic background             | Age <sup>22,56,85</sup> , Older age <sup>37,84</sup> , younger age <sup>31,40,57,80,106,107</sup> , sex of the individual <sup>100</sup> , being female <sup>106,119</sup> or male <sup>85,99</sup> , presence of preschool children in the household <sup>101</sup> , young adult <sup>119</sup> , demographic status <sup>54</sup>                                                      |
| Socio-economic status              | Poor/low socio-economic status <sup>22,54,74,81,102</sup> , attending a gathering <sup>94</sup> , per capita disposable income of all residents, and per capita GDP <sup>100</sup> , unemployment or part-time work <sup>27</sup> , being part of a nuclear family <sup>47</sup> , wealth index <sup>88</sup> , being a student <sup>45</sup> , attending school or daycare <sup>66</sup> |
| Education level                    | No/low educational level <sup>25,46,118</sup> , educational level <sup>56</sup> , years of schooling <sup>88</sup> , students in conventional institutions of higher learning <sup>100</sup> , illiteracy rate <sup>47,102,103</sup>                                                                                                                                                      |
| Occupational risk                  | Mishandling of <i>S. Typhi</i> samples by clinical microbiology laboratory staff <sup>70</sup> , medical, laboratory personnel and sewage workers occupationally exposed to <i>Salmonella</i> bacteria <sup>89</sup> , household member growing crops <sup>66</sup> , farmers <sup>85</sup> , rearing chicken or goats <sup>90</sup> , job-related cause <sup>61</sup>                    |
| Population growth and overcrowding | Rising/bigger household size <sup>26,102</sup> , living in a crowded household <sup>29</sup> , crowding poor living conditions <sup>61</sup> , Increased population density <sup>31,111</sup>                                                                                                                                                                                             |
| housing system/ condition          | Poor housing condition <sup>77</sup>                                                                                                                                                                                                                                                                                                                                                      |

927

928

Table 4. Hygiene and Sanitation risk factors for typhoid fever susceptibility

| Common factors                 | Specific risk factors                                                                                                                                                                                                                                                                                                                                                                                                                                                                                                                                                                                                                                                                                                                              |
|--------------------------------|----------------------------------------------------------------------------------------------------------------------------------------------------------------------------------------------------------------------------------------------------------------------------------------------------------------------------------------------------------------------------------------------------------------------------------------------------------------------------------------------------------------------------------------------------------------------------------------------------------------------------------------------------------------------------------------------------------------------------------------------------|
| Hygiene and Behavioral factors | Scarcity of soap near a hand washing facility <sup>26</sup> , non-use of soap for handwashing <sup>11,47,67,106</sup> , non-use of medicated soap <sup>26</sup> , non-availability of soap to wash hands after toilet use <sup>66,102</sup> , a habit of not washing hands before cooking/after defecating <sup>51</sup> , infrequent hand washing after latrine use <sup>11,95</sup> , poor hand washing practices <sup>103</sup> , occasionally/never washing hand with water and soap <sup>23,120</sup> , never/rarely washing hands before preparing/handling food, eating or feeding <sup>27,28,118</sup>                                                                                                                                     |
| WASH practices                 | Poor WASH practices <sup>72</sup> , not living in a better WASH household <sup>73,104</sup>                                                                                                                                                                                                                                                                                                                                                                                                                                                                                                                                                                                                                                                        |
| Sanitation and sewage systems  | Use of pit latrine <sup>25,90</sup> , open defecation <sup>90</sup> , improper disposal of solid waste <sup>25</sup> , burst sewer pipes at home <sup>94</sup> , living in houses with open sewers <sup>27</sup> , visible urine or faeces <sup>51</sup> , poor sanitary practice <sup>13,61,93,96,111</sup> , having home latrines <sup>36</sup> , no toilets at/in the residence <sup>106,113</sup> , poor excreta disposal <sup>77</sup> , having unimproved or malfunctioning sanitation infrastructure <sup>11</sup> , unsterilized water from the hospital disposal and residential sewage used to irrigate vegetable farmlands <sup>108</sup> , inadequate public sewerage system <sup>88</sup> , poor toilet drainage soil <sup>77</sup> . |

929

930

Table 5: Other risk factors for typhoid fever

| Common factors      | Specific risk factors                                                                                                                                                                                                                                                                                                                                |
|---------------------|------------------------------------------------------------------------------------------------------------------------------------------------------------------------------------------------------------------------------------------------------------------------------------------------------------------------------------------------------|
| Antimicrobial Agent | Frequent/history/ of antimicrobial usage <sup>32,45,53,60,61,74,79,99</sup> , Chloramphenicol-resistant <i>S. Typhi</i> strain <sup>42,77</sup> , ceftriaxone-resistant <i>S. Typhi</i> strain <sup>117</sup> , MDR or XDR <i>S. Typhi</i> strains <sup>119</sup> , circulation of virulent <i>S. Typhi</i> strain (H58-lineage) <sup>58,101</sup> . |

|                                    |                                                                                                                                                                                                                                                                                                                                                                                                                                                                                                                                                                                                                                                                                                 |
|------------------------------------|-------------------------------------------------------------------------------------------------------------------------------------------------------------------------------------------------------------------------------------------------------------------------------------------------------------------------------------------------------------------------------------------------------------------------------------------------------------------------------------------------------------------------------------------------------------------------------------------------------------------------------------------------------------------------------------------------|
| Host risk factors                  | Polymorphism in intronic VNTR of IL-4 <sup>33</sup> , presence of serum anti- <i>H. pylori</i> IgG antibodies <sup>47,107</sup> , history of chronic underlying disease <sup>67</sup> , HIV infections <sup>69</sup> , Haplotype of TNF locus from SNPs <sup>122</sup>                                                                                                                                                                                                                                                                                                                                                                                                                          |
| Typhoid carrier/s                  | Recent/close contact with confirmed/active typhoid fever patient <sup>30,46,61,86,99,103</sup> , hospitalization of household member with febrile illness <sup>66</sup> , history of typhoid fever infections <sup>67</sup> , having typhoid carrier at home <sup>63</sup> , recent typhoid fever case in the household <sup>106</sup> , having a housekeeper (a boy or girl) <sup>118</sup> .                                                                                                                                                                                                                                                                                                  |
| Vaccination                        | No/lack of vaccination <sup>61,73,104</sup> , vaccine hesitancy <sup>118</sup> , vaccine ineffectiveness <sup>92</sup> , poor vaccination coverage <sup>101</sup>                                                                                                                                                                                                                                                                                                                                                                                                                                                                                                                               |
| Health education                   | Lack of knowledge regarding typhoid fever contact <sup>26</sup> , poor awareness of typhoid fever disease <sup>95</sup> .                                                                                                                                                                                                                                                                                                                                                                                                                                                                                                                                                                       |
| Travel-related risk                | Longer duration of stay in the endemic area <sup>37</sup> , returning/visiting endemic countries <sup>74,84,114</sup> , visiting friends and relatives in endemic areas <sup>37,71</sup> , travel destination <sup>62</sup> , travel outside the United States or Sweden (international travel) <sup>39,57,91</sup> , Asian travellers <sup>50</sup> , children visiting friends and relatives in endemic places (particularly South Asia) <sup>59,97</sup> , recent travel to endemic areas <sup>83,123</sup> , transient male workers <sup>80</sup> , living in a metropolitan area <sup>84</sup> , urbanization <sup>88</sup> , number of foreign tourists received (tourism) <sup>100</sup> |
| Environmental conditions/factors   | Living in geographically lower elevation areas <sup>40</sup> , neighbours to a typhoid fever case <sup>52</sup> , potentially floodable areas <sup>55</sup> , proximity to major rivers and creeks <sup>55</sup> , housing (external condition) <sup>77</sup> , a lack of agricultural land <sup>113</sup> , hydrological catchment areas <sup>119</sup> , residing closer to waterbodies, residing near typhoid study treatment centres <sup>102</sup> , Anthropogenic alteration of land cover and hydrology <sup>76</sup> , Environmental factors <sup>54</sup>                                                                                                                              |
| Climate/<br>Meteorological factors | Seasonal variation or fluctuations <sup>22,80,100,108</sup> , high temperatures during summer <sup>101</sup> , rainfall <sup>55,113</sup> , temperature and precipitation <sup>109,113</sup> , high vapour pressure <sup>113</sup> , rainy and harmattan seasons <sup>34</sup> , extreme weather conditions <sup>75</sup> , higher/hot temperatures <sup>64,84</sup> , flooding <sup>85</sup> , wind speed <sup>88</sup>                                                                                                                                                                                                                                                                        |

931  
932  
933
